1                   **Reproductive mode, stem cells and regeneration in a freshwater**  
2                   **cnidarian with post-reproductive senescence**

3  
4  
5                   Flóra Sebestyén<sup>1,2</sup>, Zoltán Barta<sup>1</sup> & Jácint Tökölyi<sup>1</sup>  
6  
7  
8  
9

10  
11   <sup>1</sup> - MTA-DE Behavioural Ecology Research Group, Dept. of Evolutionary Zoology, University of  
12   Debrecen, Egyetem tér 1, 4032 Debrecen, Hungary.

13   <sup>2</sup> - [flora.sebestyen@gmail.com](mailto:flora.sebestyen@gmail.com)  
14

## 15 **Abstract**

16

17 In many basal metazoans both somatic and reproductive functions are performed by cellular derivatives  
18 of a single multipotent stem cell population. Reproduction can drain these stem cell pools, imposing a  
19 physiological cost with subsequent negative effects on somatic maintenance functions. In the  
20 freshwater cnidarian *Hydra oligactis* both asexual (budding) and sexual reproductive modes  
21 (production of resting eggs) are present, and both of these are dependent on a common pool of  
22 interstitial stem cells. Resting eggs tolerate abiotic conditions which neither the parental animals, nor  
23 asexual offspring can survive (e.g. freezing). Therefore, when facing unfavorable conditions and  
24 increased mortality risk, hydra polyps are expected to show higher differentiation of interstitial stem  
25 cells into germ cells (i.e. sexual reproduction), compared to other cell types needed for self-  
26 maintenance or asexual reproduction. Here, by comparing sexually and asexually reproducing  
27 individuals to non-reproductives, we studied the physiological costs of reproduction (size of interstitial  
28 stem cell pools, their somatic derivatives and regeneration rate, which is dependent on these cell types)  
29 in *H. oligactis* polyps from a free-living Hungarian population prior to the onset of winter. Sexual  
30 individuals (but not asexuals) were characterized by significantly smaller interstitial stem cell pools,  
31 fewer somatic derivatives (nematoblasts involved in food capture) and lower regeneration ability  
32 compared to non-reproductives. We also found a negative correlation between germ cell counts and  
33 stem cell numbers in males (but not in females). These results show that the physiological costs of  
34 reproduction are higher for sexual individuals. They also suggest that increased differentiation of stem  
35 cells into gametes might limit investment into somatic functions in hydra polyps. Exhaustion of cellular  
36 resources (stem cells) could be a major mechanism behind the extreme post-reproductive senescence  
37 observed in this species.

38

39 **Keywords:** cost of reproduction, gametic crisis, Hydra, interstitial cells, life history trade-offs.

## 40 Introduction

41

42 Sexual reproduction is ubiquitous in the natural world. Sex has clear evolutionary benefits over asexual  
43 reproduction (such as producing recombinant genotypes that have higher fitness under changing  
44 conditions), but it also entails costs (such as the cost of producing males; Maynard Smith 1978).  
45 Asexual reproduction does not entail these costs and can be evolutionarily favoured under special  
46 conditions (Crow 1994). Both sexual and asexual reproduction have a common cost: that of investing  
47 resources into offspring at the expense of self-maintenance of the parent (the physiological cost of  
48 reproduction; Calow 1979; Harshman & Zera 2007; Flatt & Heyland 2011). In animals, commonly  
49 studied costs of reproduction are the drain of specific macronutrients (e.g. amino acids, proteins or  
50 carbohydrates; (Zera and Zhao, 2006; Cotter et al., 2011)), micronutrients (e.g. dietary antioxidants;  
51 (Alonso-Alvarez et al., 2008; Catoni et al., 2008)) or metabolic reserves (e.g. body fat; Ellers, 1995).  
52 However, any factor in limited supply that is required by multiple life functions can mediate trade-offs  
53 between reproduction and somatic maintenance.

54 In animals with high tissue plasticity – like sponges, cnidarians and flatworms – stem cells  
55 might represent such a limiting factor. While in adult vertebrates stem cells have only limited plasticity  
56 (Weissman, 2000), in some invertebrates the adult body contains populations of highly flexible multi-  
57 or pluripotent stem cells (e.g. archeocytes in sponges, interstitial cells in some cnidarians, neoblasts in  
58 flatworms) which are responsible for the maintenance of a wide range of functions through their  
59 derivatives (Extavour and Akam, 2003; Juliano et al., 2010; Gold and Jacobs, 2013; Kumano, 2015).  
60 The strong role of these stem cells in self-maintenance is clearly seen in hydrozoans where, for  
61 instance, interstitial cells give rise to nerve cells, nematocytes (stinging cells usable once to capture  
62 food) and gland cells involved in digestion (Bode, 1996; Bosch, 2009; David, 2012; Plickert et al.,  
63 2012). The availability of these cells (i.e. cellular resources) is thought to determine growth rate and the  
64 magnitude of regenerative responses in sponges, corals and hydrozoans (Tardent, 1963; Lang da  
65 Silveira and Van't Hof, 1977; Simpson, 1984; Rinkevich, 1996; Henry and Hart, 2005) and  
66 experimental elimination of stem cells in the freshwater cnidarian *Hydra* impairs several life functions  
67 related to the descendant cell types (Diehl and Burnett, 1964; Marcum and Campbell, 1978; Marcum  
68 and Campbell, 1978; Sugiyama and Wanek, 1993). On the other hand, multipotent interstitial cells are  
69 also strongly involved in reproduction: they are incorporated into asexual offspring during fission,  
70 fragmentation or budding (Simpson 1984; Bode 1996), produce resting bodies (gemmules and  
71 reduction bodies in sponges; Simpson 1984), and give rise to germ cells (Simpson 1984; Bosch &  
72 David 1987; Newark et al. 2008) or germline stem cells (a less potent stem cell lineage which can  
73 differentiate into gametes but not somatic cells; Nishimiya-Fujisawa and Kobayashi, 2012; Sato et al.,  
74 2006).

75 The common involvement of a single pool of multipotent progenitors in both somatic and  
76 reproductive functions, in theory, implies that increased investment into reproduction (either sexual or  
77 asexual) necessarily reduces differentiation of stem cells into somatic derivatives, thereby contributing  
78 to the physiological cost of reproduction (Rinkevich, 1996; Henry & Hart 2005). However, if the  
79 expected reproductive value of sexual and asexual offspring is not equal, then reproductive investment  
80 into these offspring types should also differ. Such a difference in reproductive value between offspring  
81 types could arise e.g. if expected survival rate of sexual and asexual offspring is not identical. Indeed,  
82 differential investment into sexual and asexual reproduction is commonly seen in several animal groups  
83 (e.g. ascidians: Yund et al. 1997; aphids: Nespolo et al. 2009; *Daphnia*: Innes & Singleton 2008;  
84 freshwater hydra: Kaliszewicz and Lipińska 2011). However, much less is known about the  
85 physiological consequences of this differential allocation.

86 The freshwater cnidarian *Hydra oligactis* is a species with a mostly temperate/arctic distribution  
87 in the Northern Hemisphere. *H. oligactis* polyps reproduce asexually throughout the year, but switch to

88 sexual reproduction during the autumn (Schuchert, 2010). The most commonly invoked explanation for  
89 this switch in reproductive mode is to produce the resting eggs that can survive the winter (Reisa 1973).  
90 Based on laboratory experiments, sexual reproduction is followed by a senescence-like degeneration  
91 and increased mortality of polyps (Brien, 1953; Yoshida et al., 2006; Tomczyk et al., 2015; Tökölyi et  
92 al., in press; Schenkelaars et al., 2017). Post-reproductive degeneration is accompanied by marked  
93 changes in the cellular composition of hydra polyps: interstitial cell populations are strongly reduced  
94 while reproductive cells increase in number (Tardent, 1974; Yoshida et al., 2006). Because of these  
95 changes, post-reproductive senescence in hydra is hypothesized to be the consequence of "gametic  
96 crisis", in which stem cell populations become exhausted due to excessive differentiation into  
97 reproductive cells, limiting their involvement in somatic functions (Brien, 1966; Tardent, 1968;  
98 Tardent, 1974; Bosch, 2009).

99 In this study, we investigated cellular composition and regeneration rate in *H. oligactis* polyps  
100 differing in reproductive modes (sexual, asexual and non-reproductive individuals), sampled from their  
101 natural environment during the autumn sexual period. Firstly, the role of cellular resources in mediating  
102 the trade-off between reproduction and self-maintenance is poorly understood in natural populations of  
103 any taxon. To date, the role of the stem cell pool in this trade-off is suspected mostly based on the  
104 negative linkage between traits depending on stem cells (like suppressed regeneration during  
105 reproduction (Campbell, 1967)), and the actual depletion of stem cells after initiation of sexual  
106 reproduction - representing a more direct role and limitation of these cells - has been reported only in a  
107 handful of cases (Littlefield, 1985; Yoshida et al., 2006; Gold and Jacobs, 2013). Post-reproductive  
108 senescence and stem-cell depletion has been described in *H. oligactis* in the laboratory (Yoshida et al.,  
109 2006), but little is known about this phenomenon under natural conditions. Furthermore, previous  
110 studies worked with a few laboratory strains of *H. oligactis* and it is unclear whether variation in  
111 reproductive strategies are associated with patterns of stem cell loss and changes in regeneration ability,  
112 as would be predicted from life history theory.

113 We hypothesized that reproductive value of sexual offspring should be higher because these can  
114 survive the winter, while asexual offspring cannot. As a consequence, sexual individuals should invest  
115 more into reproduction, which would result in higher overall physiological cost of reproduction.  
116 Supporting the mediator role of the stem cell pool, this would manifest itself in lower availability of  
117 stem cells, their somatic derivatives and somatic functions depending on stem cells as well.  
118 Accordingly, we predicted lower number of stem cells, fewer nematoblasts (indicating reduced  
119 differentiation into somatic functions) and lower ability to regenerate in sexual individuals compared to  
120 asexuals or non-reproductives. Furthermore, we also predicted that, if differentiation of stem cells into  
121 reproductive function is traded off with somatic maintenance, then the number of reproductive cells  
122 should be negatively related to interstitial stem cells and their somatic derivatives.

123

## 124 **Materials & methods**

125

### 126 *Collection of animals and culture conditions*

127

128 Experimental animals were collected from an oxbow lake near Tiszadorogma in Eastern Hungary  
129 (47.6712N, 20.8641E). To determine the reproductive status of the animals in the lake and hence to  
130 detect the start of the autumn reproductive period we visited the site on 2<sup>nd</sup> and 16<sup>th</sup> October 2016 and  
131 collected N = 168 (N = Number of collected animals) and N = 136 hydra polyps, respectively. Further  
132 collections were performed four times in 2016: 26<sup>th</sup> October (N = 127), 2<sup>th</sup> November (N = 332), 15<sup>th</sup>  
133 November (N = 121) and 6<sup>th</sup> December (N = 51). Animals collected on the first two dates were not used  
134 in regeneration experiments or for quantification of cellular composition, only for the detection of  
135 sexual reproduction period. We collected animals from several sites along the shoreline of the lake to

136 reduce the chance of obtaining genetically identical clones produced by asexual budding. Hydras were  
137 picked up from submerged vegetation, placed in Eppendorf tubes and brought to the laboratory in a  
138 cool box on the same day. In the laboratory, we recorded mode of reproduction according to three  
139 categories: (1) no reproduction (polyps without buds or gonads, N=272), (2) asexual reproduction  
140 (polyps with at least one bud, N=204), or (3) sexual reproduction (polyps with differentiated or  
141 developing gonads; this latter was defined as a thick, opaque swelling around the gastric region of the  
142 body column, N=155). Sexual individuals were further divided into three categories: males (polyps  
143 with differentiated testes, N=25), females (polyps with differentiated eggs, N=34), and sexual  
144 individuals in which sex could not be determined (N=96). This latter category included immature males  
145 and females with developing testes or eggs, and post-reproductives showing the morphological  
146 characteristics of sexual reproduction, but without clearly defined reproductive organs, since these  
147 categories are not unambiguously distinguishable. Animals were clearly referable to only one category  
148 of reproduction modes (we found just two asexual animals showing the morphological sign of sexual  
149 reproduction; these were coded as sexual individuals because gonadogenesis was clearly initiated).

150

#### 151 *Head regeneration measurements*

152

153 About half of the collected animals (altogether 338) were randomly assigned to head regeneration  
154 measurements, which were initiated one day after each of the four collections. Animals were  
155 decapitated below the tentacles, which means that the removed part contained the oral tip (i.e. the  
156 hypostome), the tentacles and a short part of the trunk (~10% of the body length). During regeneration  
157 we kept the animals individually in 24-well plates in ~3ml standard hydra medium (1.0 mM CaCl<sub>2</sub>, 0.1  
158 mM MgCl<sub>2</sub>, 0.03 mM KNO<sub>3</sub>, 0.5 mM NaHCO<sub>3</sub>, 0.08 mM MgSO<sub>4</sub>; Zhang et al., 2002). We placed the  
159 plates with hydras in a Memmert ICP 700 climate chamber and kept them on constant photoperiod (16  
160 h dark/ 8 h light cycle) and temperature in accordance with natural habitat temperature measurements  
161 on the four consecutive dates (12 °C, 9 °C, 5 °C, 4 °C, measured approximately 20 cm below the water  
162 surface on the day of collection). Hydras completely regenerate their head after 48-72 h on 18°C  
163 (Ambrosone et al., 2012), but at lower temperature cell cycle and cell division is slower (Begasse et al.,  
164 2015), thus regeneration takes longer (Lillie and Knowlton, 1897). For this reason, we recorded  
165 regeneration 4 days after decapitation by a binary code system, based on the presence or absence of  
166 newly emerged tentacles.

167 The hypostome and tentacles amputated for the head regeneration experiments were used for  
168 species determination. *H. oligactis* can be distinguished from other *Hydra* species occurring at this site  
169 based on nematocyte morphology, which can be observed under a light microscope.

170

#### 171 *Cell number measurement*

172

173 One day after collection, we randomly selected a subset (altogether 155 animals) from the remainder of  
174 the animals for cell number measurement. These were macerated according to the standard procedure  
175 described by David (1973), and then cells were spread on a microscopic slide. Sample size for the cell  
176 number measurement was determined by time constraints: we only used samples for which macerations  
177 could be prepared on the next day after collection, such that cellular composition measured by us is as  
178 close as possible to the condition of animals at the time of sampling. Cellular composition was  
179 quantified within a few days after maceration. For each sample we recorded the number of epithelial  
180 cells, interstitial stem cells (large single interstitial cells or nests of two interstitial cells were recorded  
181 together to obtain an estimate of the frequency of stem cells; (Bosch and David, 1987), nematoblast  
182 nests (total number of nests of 1, 2, 3-4, 5-8 or >8 cells) and reproductive cells (sperm/sperm precursor  
183 nests in males and nurse cells in females). Reproductive cells at later stages of development are

184 distinguishable from interstitial cells based on morphological criteria, as follows. In males, interstitial  
185 cell nests committed to sperm development increase in number and size and flagella start to develop on  
186 the sperm precursors (Littlefield, 1985). We used the presence of flagella as a morphological criterion  
187 to identify sperm cells/sperm precursors and counted the number of sperm/sperm precursor nests (i.e.  
188 groups of sperm precursors) with flagella to obtain a semiquantitative estimate of germ cell numbers in  
189 males (in this estimate all sperm precursor nests were pooled irrespective of the number of cells in  
190 them; this was necessary because the large number of individual germ cells in some nests made exact  
191 counting of cell numbers impractical). In females, interstitial cells committed to germ cell  
192 differentiation first increase in size and develop into nurse cells, which can be distinguished from  
193 interstitial cells by their larger cytoplasm volume (Zihler, 1972). Cells were identified as nurse cells  
194 when the diameter of the nucleus was equal or less than half of the cell diameter, indicating relatively  
195 large cytoplasm volume. This corresponds to Stage B oögonia in Zihler's (1972) notation. Only a small  
196 subset of these nurse cell develop into oocytes, but these incorporate neighbouring nurse cells through  
197 phagocytosis (Miller et al., 2000). Hence all nurse cells contribute to reproduction and therefore we  
198 counted all of them.

199 In all samples we systematically traversed slides until at least one hundred epithelial cells were  
200 recorded, and noted any other cell types alongside these epithelial cells. The median number of  
201 cells/cell nests recorded per sample (including the epithelial cells) was 208 (range: 107-3048).

202 The head region of the animals assigned to investigation of cellular composition was removed  
203 in the same way as in the head regeneration experiments and used for species determination. All sexual  
204 individuals involved in cell number measurements were categorized as males or females, based on the  
205 presence of mature gonads and / or sperm cells / nurse cells in macerates.

206

### 207 *Statistical analysis*

208

209 The effect of reproductive mode on head regeneration was analyzed using Generalized Linear Mixed  
210 Models (GLMM) with binomial distribution. Our model contained regeneration (presence or absence)  
211 as dependent variable and reproduction mode as predictor. We included collection date as a fixed effect,  
212 to control for seasonal and temperature differences. We included collection site as a random effect to  
213 control for the possibility that animals from the same sampling point might be more similar to each  
214 other than to individuals from other sites because of shared environment or because some of them  
215 might be asexual descendants of a single individual. Binomial GLMMs were implemented in a  
216 Bayesian framework, employing the MCMCglmm R package (Hadfield, 2010; R Core Team, 2017). A  
217 Bayesian approach was required because our data suffered from complete separation (some  
218 experimental groups contained only non-regenerating animals). This problem can be circumvented in a  
219 Bayesian setting by setting a weak prior on fixed effects in MCMCglmm. We ran this model two times  
220 for our data sets then averaged the two results.

221 For testing the effect of reproductive mode on nematoblast and interstitial cell number, we used  
222 Poisson GLMM also implemented in a Bayesian framework. We included epithelial cell number as a  
223 fixed effect, because the number of epithelial cells was not exactly identical (sometimes we counted  
224 slightly more than one hundred); by controlling for epithelial cell number we take into account  
225 variation in stem cell numbers arising from slightly unequal sampling. We also included collection date  
226 as a fixed effect and collection site as a random effect for the reasons mentioned above. For analyzing  
227 the relation between sperm/nurse cell number and interstitial or nematoblast cell number (all cell type  
228 numbers were normalized to epithelial cell number), we performed Spearman rank correlation. All  
229 analyzes were performed in the R Statistical Environment (R Core Team, 2017).

230

## 231 Results

232

### 233 *Reproductive phenology*

234

235 None of the individuals collected on 2<sup>nd</sup> October showed signs of sexual development. A single male  
236 bearing mature testes was observed on 16<sup>th</sup> October. The proportion of sexual individuals on  
237 subsequent dates was 20.5%, 29.8%, 22.3% and 5.9% on 26<sup>th</sup> October, 2<sup>th</sup> November, 15<sup>th</sup> November  
238 and 6<sup>th</sup> December, respectively (Fig. 1). The proportion of asexual animals was 18.1%, 30.1%, 46.3%  
239 and 49%, on the respective dates (Fig. 1).

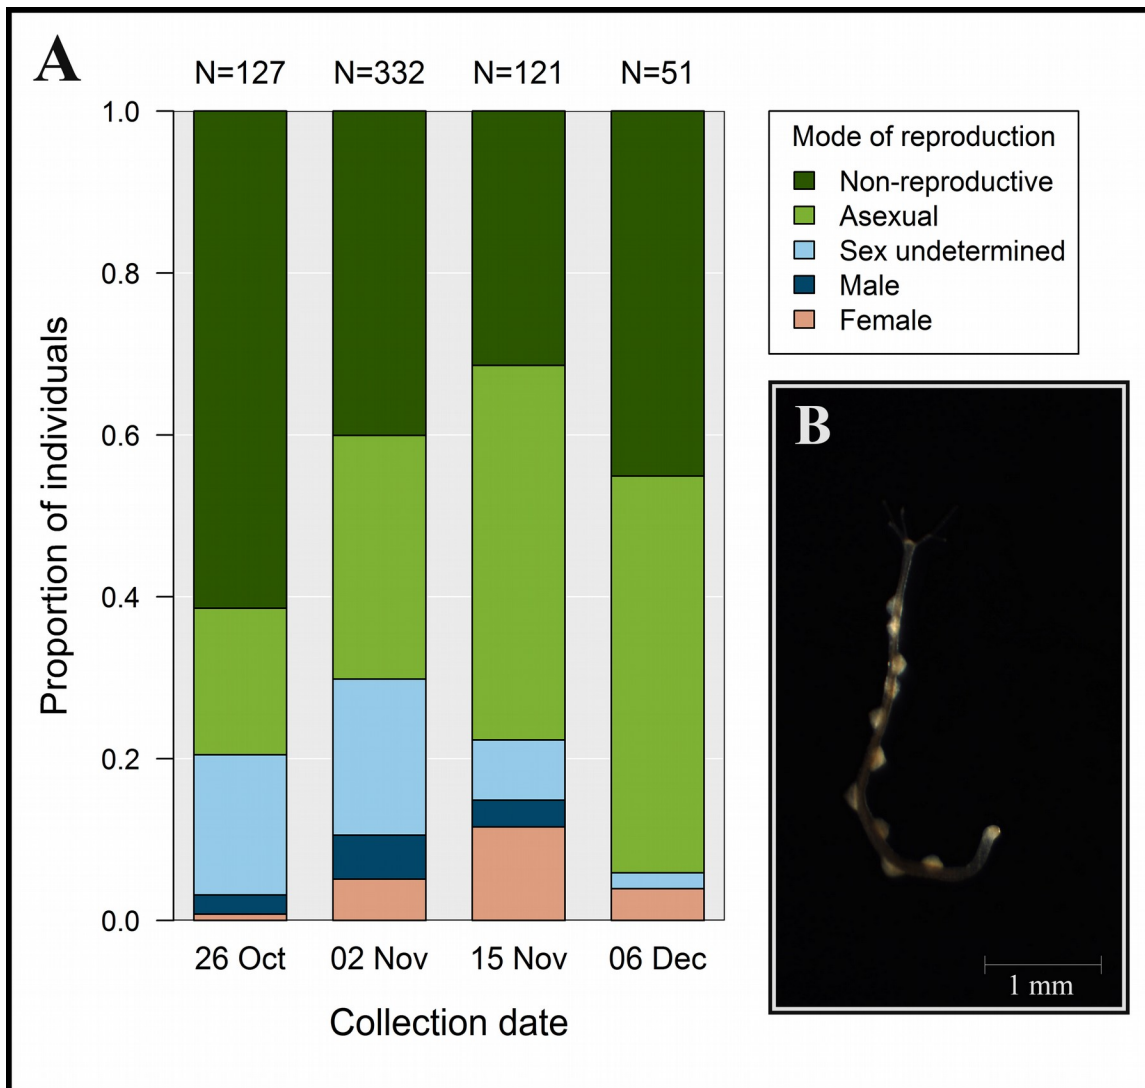

241 Fig. 1. Proportion of individuals in different reproduction mode categories on four collection dates.  
242 Total sample sizes are shown above the bars (A). Reproductive mode categories were: non-  
243 reproductive (polyps without buds or gonads), asexual (polyps with at least one bud) and sexual  
244 (polyps with differentiated eggs (females), testes (males) or developing gonads (sex undetermined)).  
245 (B) Photograph of a wild-collected male polyp showing signs of post-reproductive degeneration  
246 (depleted testes and strongly reduced tentacles), collected on 02 Nov.

247

## 248 *Head regeneration*

249

250 Regeneration abilities differed between reproduction mode categories (Fig. 2). Compared to non-  
251 reproductive animals (56.85% regenerated heads within 4 days), the proportion of animals regenerating  
252 heads was significantly lower in males (0%; posterior mean = -5.431, lower 95% CI = -8.855, upper  
253 95% CI = -2.157,  $p < 0.001$ ), females (0%; posterior mean = -4.667, lower 95% CI = -8.545, upper 95%  
254 CI = -1.542,  $p < 0.001$ ) and animals with undetermined sex (23.21%; posterior mean = -2.341, lower  
255 95% CI = -3.353, upper 95% CI = -1.351,  $p < 0.001$ ). In asexual hydras, head regeneration did not differ  
256 significantly from non-reproductive individuals (30.61%; posterior mean = 0.568, lower 95% CI =  
257 -1.447, upper 95% CI = 0.252,  $p = 0.179$ ). Collection date as a fix effect had significant effect on  
258 regeneration rate: compared to the first collection, regeneration rate was significantly lower in all dates  
259 (results not shown).

260

261

262

263

264

265

266

267

268

269

270

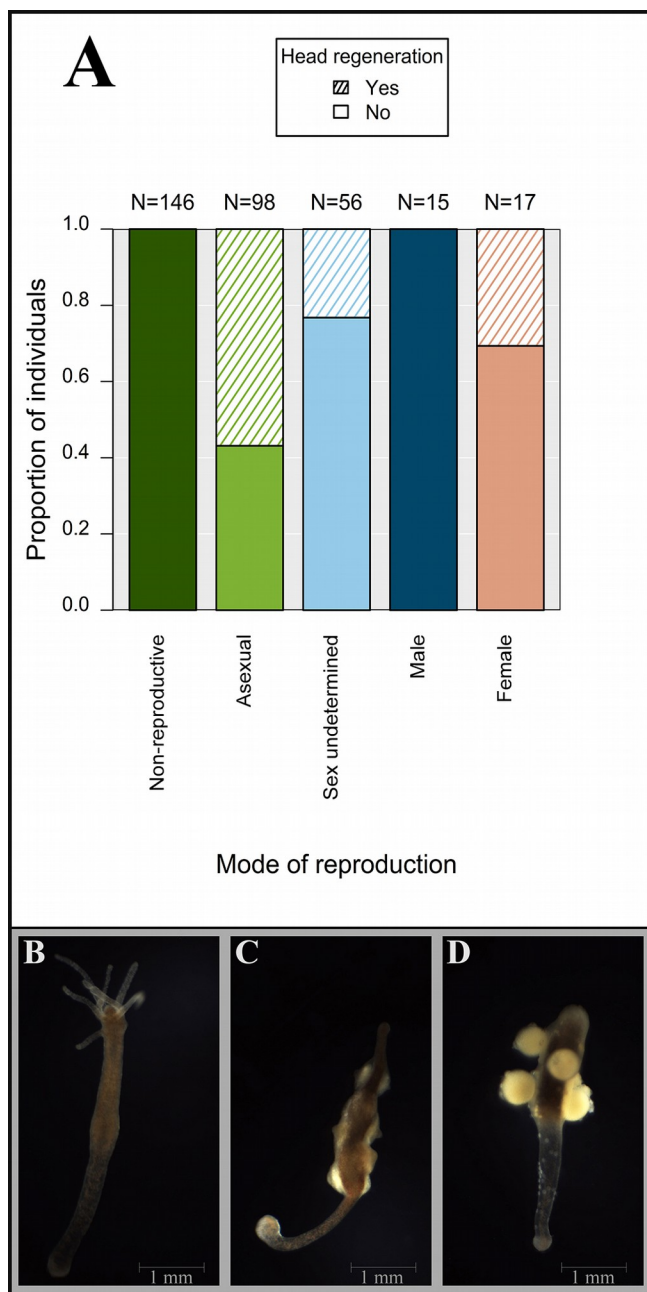

Fig. 2. Head regeneration (presence or absence of tentacles) 4 days after decapitation in hydras differing in reproductive mode (A). Non-reproductive (B), male (C) and female (D) polyp after decapitation illustrating the markedly reduced head regeneration ability of sexual individuals. See Fig. 1. for reproductive mode categories. Photographs were taken after finalization of regeneration experiments (8 days post-amputation).



271 *Nematoblast and interstitial cell number and mode of reproduction*

272

273 Mode of reproduction had a significant effect on both nematoblast cell number and interstitial cell  
274 number (Fig.3). Compared to non-reproductive animals, interstitial cell number did not differ in  
275 asexually reproducing individuals (posterior mean = 0.195, lower 95% CI = -0.331, upper 95% CI =  
276 0.752,  $p = 0.494$ ), but it was lower in males (posterior mean = -0.923, lower 95% CI = -1.602, upper  
277 95% CI = -0.23,  $p = 0.008$ ) and females (posterior mean = -1.254, lower 95% CI = -1.753, upper 95% CI  
278 = -0.792,  $p < 0.001$ ). Nematoblast cell number was significantly lower in males (posterior mean =  
279 -1.196, lower 95% CI = -1.937, upper 95% CI = -0.416,  $p < 0.001$ ) and females (posterior mean =  
280 -1.929, lower 95% CI = -2.488, upper 95% CI = -1.383,  $p < 0.001$ ), but it was marginally significantly  
281 higher in asexual animals (posterior mean = 0.578, lower 95% CI = -0.023 upper 95% CI = 1.144,  $p =$   
282 0.055), compared to non-reproductives.

283

284

285

286

287

288

289

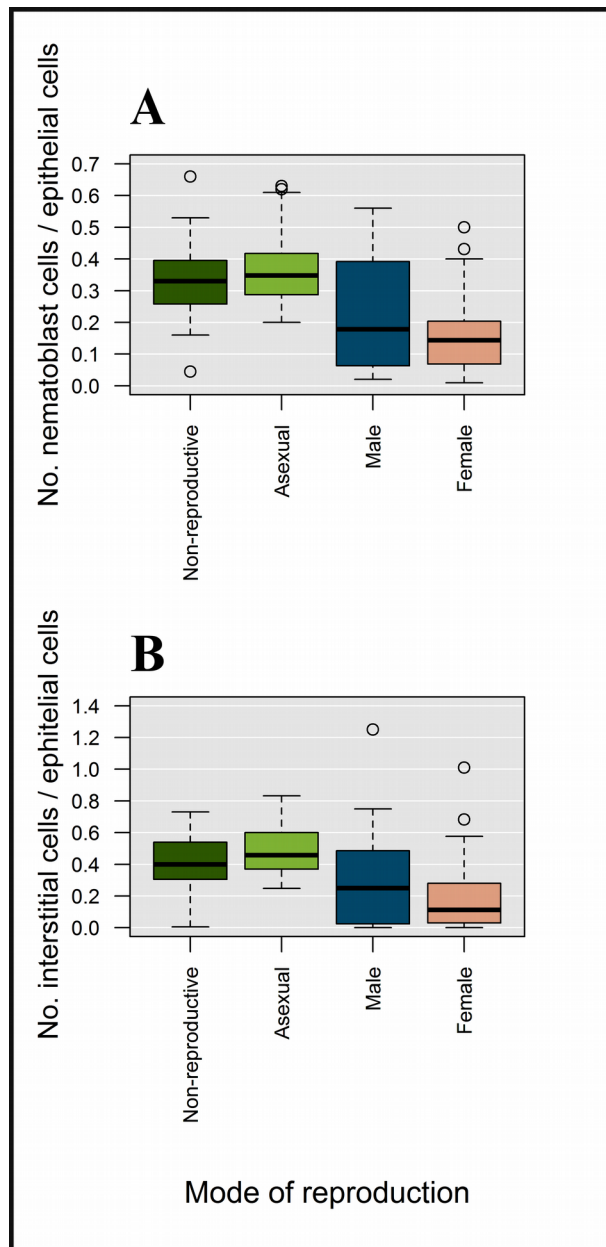

Fig. 3. Nematoblast number (A) and interstitial stem cell number (B) of individuals in different reproductive mode categories. All sexual individuals were categorized as males or females based on the presence of mature gonads and / or sperm cells / nurse cells in macerates.

290

291 *Gamete and interstitial cell number*

292

293 There was a significant negative correlation between number of sperm precursor nests and interstitial  
294 cell number (Spearman correlation,  $\rho = -0.764$ ,  $p < 0.001$ ,  $N = 22$ ), as well as number of sperm precursor  
295 nests and nematoblast cell number in males (Spearman correlation,  $\rho = -0.852$ ,  $p < 0.001$ ,  $N = 22$ ) (Fig.  
296 4). We found a significant positive correlation between nurse cell number and interstitial cell number in  
297 females (Spearman correlation,  $\rho = 0.424$ ,  $p = 0.002$ ,  $N = 51$ ), but there was no correlation between their  
298 nurse cell number and nematoblast number (Spearman correlation,  $\rho = 0.028$ ,  $p = 0.844$ ,  $N = 51$ ) (Fig. 4).  
299 There was a significant positive correlation between nematoblast and interstitial cell counts in both  
300 males (Spearman correlation,  $\rho = 0.578$ ,  $p = 0.008$ ,  $N = 22$ ) and females (Spearman correlation,  $\rho = 0.448$ ,  
301  $p = 0.001$ ,  $N = 51$ ).

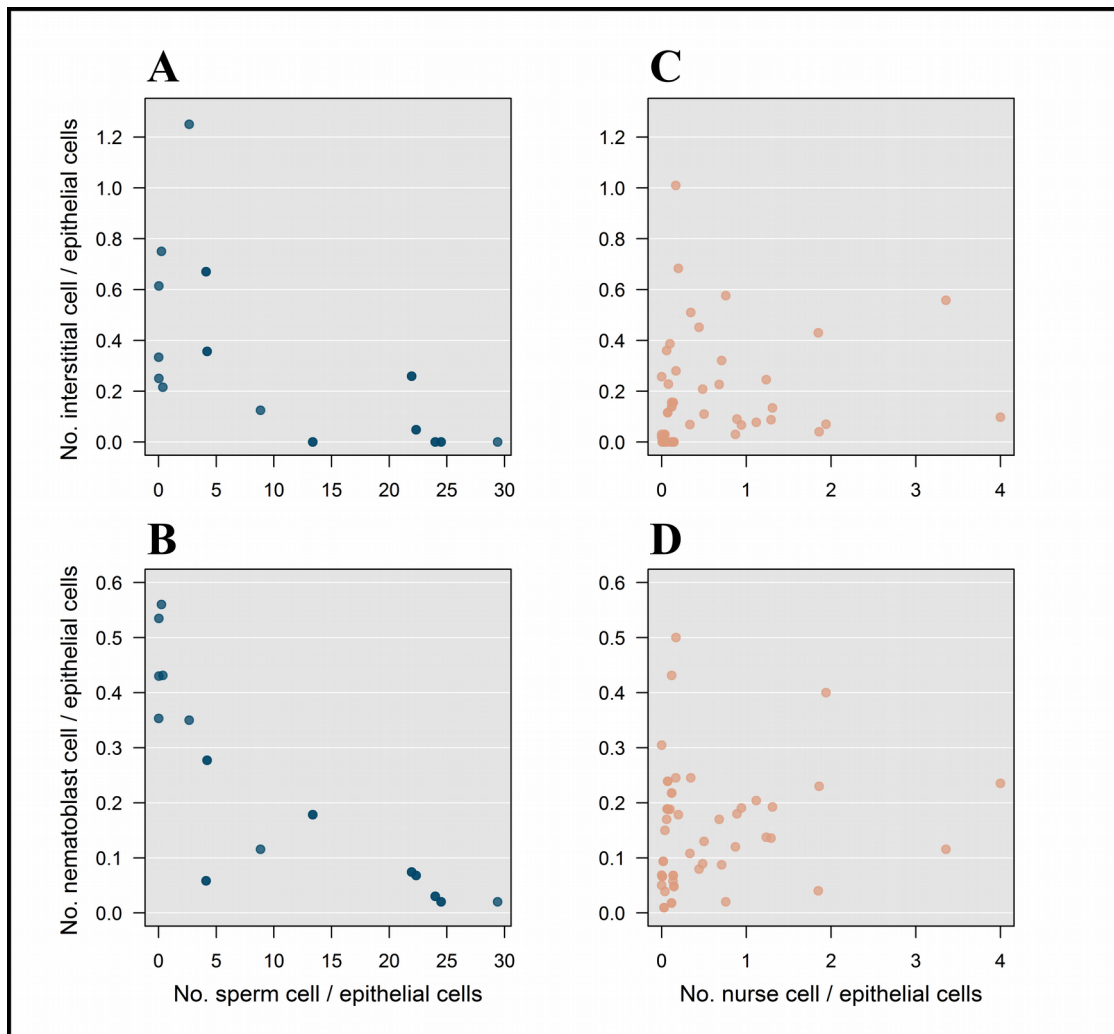

303 Fig. 4. Correlation between reproductive cell number (sperm or nurse cells) and interstitial and  
304 nematoblast cell number in females (A and B) and interstitial and nematoblast cell number in males (C  
305 and D). All cell numbers were normalized to epithelial cell number.

## 306 Discussion

307

308 In this study we described regeneration rate and cellular composition of *H. oligactis* polyps differing in  
309 reproductive strategies. We found that sexual (but not asexual) reproduction is associated with reduced  
310 regeneration ability and decreased number of interstitial stem cells and nematoblasts involved in food  
311 capture. This observation indicates that sexual reproduction is associated with increased physiological  
312 cost. Our results lend support to the hypothesis that life history decisions in *Hydra* might be mediated  
313 by a competition for a limited stem cell pool involved in multiple life functions (Rinkevich, 1996).

314 In animals with high tissue plasticity, the activity of multipotent stem cells is required for  
315 multiple life functions. Reduced availability of stem cells has been suggested to be involved in the  
316 determination of *Tubularia* hydrant lifespan (Tardent, 1963), and also thought to be responsible for  
317 post-reproductive degeneration in *H. oligactis* (Brien, 1966; Tardent, 1968; Tardent, 1974; Bosch,  
318 2009). Increased commitment of stem cells into germ cells likely reduce the differentiation of stem  
319 cells into somatic cells (a process termed "gametic crisis"; (Brien, 1966; Bosch, 2009), possibly  
320 causing a decline in survival of *H. oligactis* (Yoshida et al., 2006). Our observation that interstitial cells  
321 and nematoblasts were reduced, while germ cell numbers increased during sexual reproduction in  
322 animals from a natural population are in accordance with findings obtained under laboratory  
323 circumstances in this species (Yoshida et al., 2006). Although other *Hydra* species do not seem to show  
324 similar patterns of senescence, there is evidence that similar exhaustion might occur in *Aurelia* polyps  
325 that have been stimulated to strobilate (generate sexual medusa) many times (Gold and Jacobs, 2013).

326 In parallel to the decline in stem cell pools, regeneration rate was also reduced in sexual polyps.  
327 Regeneration is a somatic function that likely depends on the availability of cellular resources (stem  
328 cells). Stem cells are crucial in all types of regeneration either because they proliferate to produce cells  
329 that will be involved in regeneration or because they migrate to the wound site to re-form lost body  
330 parts (Sánchez Alvarado, 2000; Bely and Nyberg, 2010; Sugimoto et al., 2011). Any physiological  
331 process that reduces the availability of stem cells can therefore, in theory, limit regeneration  
332 (Kramarsky-Winter and Loya, 2000; Henry and Hart, 2005). Indeed, reduced availability of cellular  
333 resources has been invoked previously to explain the reduction in regenerative responses in response to  
334 subsequent amputations (Gross, 1925; Kanajew, 1926; Tardent and Tardent, 1956; Tardent, 1963) and  
335 the suppression of regeneration after sexual reproduction (Campbell, 1967 or vice versa: Rinkevich and  
336 Loyla, 1989).

337 The trade-off between differentiation into somatic and reproductive functions is further  
338 underscored by our observation that interstitial stem cell numbers and nematoblast numbers were  
339 negatively related to germ cell counts in males. Such a negative relationship could arise because  
340 individuals with a higher reproductive investment (larger germ cell counts) have fewer remaining  
341 interstitial cells / nematoblasts. Interestingly, we observed no relationship between reproductive cell  
342 numbers and interstitial cell / nematoblast counts in females. This could mean that the trade-off  
343 between germ cells and somatic cell types is different in females and males. However, it might also  
344 have been caused by differences in the way reproductive investment is estimated from reproductive cell  
345 counts. Specifically, in females nurse cells become incorporated into developing eggs, and during egg  
346 maturation fewer and fewer nurse cell will be located separately (Zihler, 1972; Miller et al., 2000). As a  
347 consequence, females would show a progressive reduction in both nurse cell numbers and depletion of  
348 interstitial stem cells / nematoblasts during egg maturation if stem cells differentiate into nurse cells  
349 and these become incorporated into eggs. This could explain the relatively high number of females in  
350 which nurse cells, interstitial cells and nematoblasts were all depleted (Fig. 4).

351 In spite of the strongly reduced stem cell numbers in sexually reproducing polyps (which  
352 suggest that interstitial cells are converted to germ cells during gonadogenesis), the exact explanation  
353 for interstitial cell depletion during sexual reproduction in *H. oligactis* is still not clear. Current models

354 of germ cell specification suggest that there are two interstitial stem cell lineages in *Hydra*, which are  
355 morphologically indistinguishable (reviewed in Nishimiya-Fujisawa and Kobayashi, 2012).  
356 Multipotent stem cells (MPSCs) give rise to somatic cells, like nerve cells, gland cells and  
357 nematocytes, while germline stem cells (GSCs) are unable to produce somatic cells but differentiate  
358 into nurse cells and sperm. GSCs derive from MPSCs (Nishimiya-Fujisawa and Kobayashi, 2012),  
359 hence MPSCs are able to produce both somatic and reproductive cells. This is supported by  
360 observations that (1) *H. oligactis* polyps in which GSCs were experimentally ablated are still able to  
361 quickly develop germ cells when exposed to cold temperature (Littlefield et al., 1985) and (2) cloning  
362 individual interstitial cells in another *Hydra* species (*H. magnipapillata*) can give rise to both somatic  
363 and germline cells (Bosch and David, 1987). Because of the complexity of interstitial stem cell lineages  
364 in hydra, the gaps in knowledge of their dynamics and the indistinguishability of the two major stem  
365 cell types, it is possible that only a subset of the cells identified in this study as interstitial cells  
366 (MPSCs) take directly part in the somatic-reproductive trade-off. However, since these MPSCs can  
367 differentiate into GSCs (or directly into germ cells), the trade-off in stem cell differentiation between  
368 somatic and reproductive functions remains the same. Future studies of stem cell differentiation during  
369 gonadogenesis and hydra germline stem cells would help to elucidate the exact mechanisms behind  
370 stem cell depletion during gametogenesis observed in this species.

371 While sexual reproduction was associated with reduced somatic cell types and regeneration  
372 ability, we did not observe such a reduction in asexual individuals. Interestingly, this pattern mirrors the  
373 phylogenetic distribution of reproductive mode and regeneration ability in several invertebrate groups:  
374 regenerative capacities are lower in sexual species in segmented worms (Zattara and Bely, 2016) and  
375 flatworms (Peter et al. 2001), compared to asexual ones. The higher stem cell pools and regenerative  
376 potential of asexual polyps clearly indicates that this type of reproduction does not impose such a high  
377 physiological cost on the parent polyp as sexual reproduction does. Indeed, asexual buds in *Hydra* are  
378 thought to be produced from excess cells arising from an actively dividing stem cell population (Bosch,  
379 2009; Gold & Jacobs, 2013), in which case they are less likely to drain from the limited resources of  
380 the parent. However, since asexual buds are prone to freezing just as the parent animal, they are likely  
381 to have a lower reproductive value during autumn than resting eggs. Hence, asexuals in this population  
382 appear to follow a strategy of producing offspring with low reproductive value at a low cost, as  
383 opposed to sexuals, which produce offspring of high reproductive value at a high physiological cost.  
384 This latter strategy might be considered a case of terminal investment (Williams, 1966; Clutton-Brock,  
385 1984).

386 In addition to describing patterns of reproductive mode, stem cells and regeneration in *H.*  
387 *oligactis*, we also provide data on the natural phenology of sexual reproduction for this species. While  
388 gametogenesis in *H. oligactis* is known to occur during the autumn and to last until early winter, the  
389 ecology of *H. oligactis* has been investigated by only a handful of studies so far (Welch and Loomis,  
390 1924; Miller, 1936; Bryden, 1952; Ribi et al., 1985) Sexual reproduction is thought to occur in this  
391 species when adult survival is expected to be low due the cold temperature and high risk of freezing  
392 (Reisa, 1973). However, previous studies have shown that, in general, only a subset of the population  
393 reproduces sexually at any time; moreover, sexually reproducing animals are not found in some years  
394 (Miller, 1936; Bryden, 1952; Ribi et al., 1985). In this Hungarian population, the proportion of sexually  
395 reproducing individuals was also lower than that of agonadic individuals (Fig. 1). Interestingly, the  
396 proportion of asexual animals showed an increasing tendency towards the onset of winter (even though  
397 the temperature was decreasing), possibly because sexual individuals were disappearing or reverted  
398 back to asexual reproduction (which is known to occur in individuals collected from this population  
399 under laboratory conditions; (Tökölyi et al., in press). Together with the observations that (1) initiation  
400 of sexual reproduction in *H. oligactis* strongly depends on the rate of the temperature drop  
401 (Kaliszewicz, 2015) and (2) some *H. oligactis* strains seem to have a lower propensity to initiate sexual  
402 reproduction (Tökölyi et al., in press), these results suggest that sexual reproduction in *H. oligactis* is a

403 conditional and polymorphic strategy or maybe a form of bet-hedging (a stochastic switching between  
404 phenotypic states – a way of adaptation to fluctuating environment, e.g. (Cohen, 1966)), possibly  
405 determined by specific environmental conditions of the natural habitat (e.g. the risk of freezing).

406 Overall, our results suggest that sexual reproduction imposes a high physiological cost on  
407 *Hydra oligactis* polyps. The reduced regeneration abilities and depletion of stem cells in sexually  
408 reproducing animals compared to non-reproductives might imply that current sexual reproduction is an  
409 irreversibly induced reproduction strategy, and gamete production is prioritized over the maintenance  
410 of somatic functions and future survival during autumn. The highly divergent life history decisions of  
411 *H. oligactis* provide a great model system to study aging and non-senescent life history tactics and its  
412 physiology within a single species. In addition, in order to clarify the role of limiting cellular factors,  
413 further studies focusing on common cellular pools required by life history traits are much needed.

414

## 415 **Acknowledgements**

416

417 This study was supported by NKFIH grant FK 124164. JT was supported by the ÚNKP-17-4 New  
418 National Excellence Program of the Hungarian Ministry of Human Capacities. ZB was supported by  
419 the NKFIH grant K 112527. We acknowledge the financial support of this work by the Hungarian State  
420 and the European Union under the EFOP-3.6.1 project.

421

## 422 **References**

423

424 Alonso-Alvarez, C., Pérez-Rodríguez, L., Mateo, R., Chastel, O., and Viñuela, J. (2008). The oxidation  
425 handicap hypothesis and the carotenoid allocation trade-off. *J. Evol. Biol.* *21*, 1789–1797.

426 Ambrosone, A., Mattera, L., Marchesano, V., Quarta, A., Susa, A.S., Tino, A., Rogach, A.L., and  
427 Tortiglione, C. (2012). Mechanisms underlying toxicity induced by CdTe quantum dots determined in  
428 an invertebrate model organism. *Biomaterials* *33*, 1991–2000.

429 Begasse, M.L., Leaver, M., Vazquez, F., Grill, S.W., and Hyman, A.A. (2015). Temperature  
430 Dependence of Cell Division Timing Accounts for a Shift in the Thermal Limits of *C. elegans* and *C.*  
431 *briggsae*. *Cell Rep.* *10*, 647–653.

432 Bely, A.E., and Nyberg, K.G. (2010). Evolution of animal regeneration: re-emergence of a field. *Trends*  
433 *Ecol. Evol.* *25*, 161–170.

434 Bode, H.R. (1996). The interstitial cell lineage of hydra: a stem cell system that arose early in  
435 evolution. *J. Cell Sci.* *109*, 1155–1164.

436 Boehm, A.-M., Rosenstiel, P., and Bosch, T.C.G. (2013). Stem cells and aging from a quasi-immortal  
437 point of view. *BioEssays* *35*, 994–1003.

438 Bosch, T.C.G. (2008). Stem Cells in Immortal Hydra. In *Stem Cells*, T.C.G. Bosch, ed. (Springer  
439 Netherlands), pp. 37–57.

440 Bosch, T.C.G. (2009). Hydra and the evolution of stem cells. *BioEssays* *31*, 478–486.

441 Bosch, T.C.G., and David, C.N. (1987). Stem cells of Hydra magnipapillata can differentiate into  
442 somatic cells and germ line cells. *Dev. Biol.* *121*, 182–191.

- 443 Brien, P. (1953). La Pérennité Somatique. *Biol. Rev.* 28, 308–349.
- 444 Brien, P. (1966). *Biologie de la reproduction animale* (Paris: Masson & Cie).
- 445 Bryden, R.R. (1952). Ecology of *Pelmatohydra oligactis* in Kirkpatrick's Lake, Tennessee. *Ecol.*  
446 *Monogr.* 22, 45.
- 447 Campbell, R.D. (1967). Tissue dynamics of steady state growth in *Hydra littoralis*. II. Patterns of tissue  
448 movement. *J. Morphol.* 121, 19–28.
- 449 Catoni, C., Peters, A., and Martin Schaefer, H. (2008). Life history trade-offs are influenced by the  
450 diversity, availability and interactions of dietary antioxidants. *Anim. Behav.* 76, 1107–1119.
- 451 Cichoń, M. (1997). Evolution of longevity through optimal resource allocation. *Proc. R. Soc. Lond. B*  
452 *Biol. Sci.* 264, 1383–1388.
- 453 Cotter, S.C., Simpson, S.J., Raubenheimer, D., and Wilson, K. (2011). Macronutrient balance mediates  
454 trade-offs between immune function and life history traits. *Funct. Ecol.* 25, 186–198.
- 455 David, C.N. (1973). A quantitative method for maceration of hydra tissue. *Wilhelm Roux Arch. Für*  
456 *Entwicklungsmechanik Org.* 171, 259–268.
- 457 David, C.N. (2012). Interstitial stem cells in *Hydra*: multipotency and decision-making. *Int. J. Dev.*  
458 *Biol.* 56, 489–497.
- 459 Diehl, F.A., and Burnett, A.L. (1964). The role of interstitial cells in the maintenance of hydra. I.  
460 Specific destruction of interstitial cells in normal, asexual, non-budding animals. *J. Exp. Zool.* 155,  
461 253–259.
- 462 Drenos, F., and Kirkwood, T.B.L. (2005). Modelling the disposable soma theory of ageing. *Mech.*  
463 *Ageing Dev.* 126, 99–103.
- 464 Ellers, J. (1995). Fat and Eggs: an Alternative Method To Measure the Trade-Off Between Survival and  
465 Reproduction in Insect Parasitoids. *Neth. J. Zool.* 46, 227–235.
- 466 Extavour, C.G., and Akam, M. (2003). Mechanisms of germ cell specification across the metazoans:  
467 epigenesis and preformation. *Development* 130, 5869–5884.
- 468 Flatt, T., and Heyland, A. (2011). *Mechanisms of Life History Evolution: The Genetics and Physiology*  
469 *of Life History Traits and Trade-Offs* (Oxford University Press).
- 470 Gold, D.A., and Jacobs, D.K. (2013). Stem cell dynamics in Cnidaria: are there unifying principles?  
471 *Dev. Genes Evol.* 223, 53–66.
- 472 Gross, J. (1925). Versuche und Beobachtungen über die Biologie der Hydriden. *Biol. Zbl.* 45, 385–417.
- 473 Hadfield, J.D. (2010). MCMC methods for multi-response generalized linear mixed models: the  
474 MCMCglmm R package. *J. Stat. Softw.* 33, 1–22.
- 475 Henry, L.-A., and Hart, M. (2005). Regeneration from Injury and Resource Allocation in Sponges and  
476 Corals – a Review. *Int. Rev. Hydrobiol.* 90, 125–158.

- 477 Henry, L.-A., Kenchington, E.L., and Silvaggio, A. (2003). Effects of mechanical experimental  
478 disturbance on aspects of colony responses, reproduction, and regeneration in the cold-water octocoral  
479 *Gersemia rubiformis*. *Can. J. Zool.* *81*, 1691–1701.
- 480 Juliano, C.E., Swartz, S.Z., and Wessel, G.M. (2010). A conserved germline multipotency program.  
481 *Development* *137*, 4113–4126.
- 482 Kaliszewicz, A. (2015). Intensity-dependent response to temperature in hydra clones. *Zoolog. Sci.* *32*,  
483 72–76.
- 484 Kanajew, J. (1926). Einige histologische Beobachtungen über das Entoderm der *Pelmatohydra oligactis*  
485 Pall. bei der Regeneration. *Z. wiss. Biol., Abt. D.* *67*, 228-234.
- 486 Kramarsky-Winter, E., and Loya, Y. (2000). Tissue regeneration in the coral *Fungia granulosa* : the  
487 effect of extrinsic and intrinsic factors. *Mar. Biol.* *137*, 867–873.
- 488 Krois, N.R., Cherukuri, A., Puttagunta, N., and Neiman, M. (2013). Higher rate of tissue regeneration  
489 in polyploid asexual versus diploid sexual freshwater snails. *Biol. Lett.* *9*(4), 20130422.
- 490 Kumano, G. (2015). Evolution of germline segregation processes in animal development. *Dev. Growth*  
491 *Differ.* *57*, 324–332.
- 492 Lang da Silveira, F., and Van't Hof, T. (1977). Regeneration in the gorgonian *Plexura flexuosa*  
493 (Cnidaria, Octocorallia). *Bijdr. Tot Dierkd.* *47*, 98–108.
- 494 Lillie, F.R., and Knowlton, F.P. (1897). On the Effect of Temperature on the Development of Animals.  
495 *Zool. Bull.* *1*, 179–193.
- 496 Littlefield, C.L. (1985). Germ cells in *Hydra oligactis* males: I. Isolation of a subpopulation of  
497 interstitial cells that is developmentally restricted to sperm production. *Dev. Biol.* *112*, 185–193.
- 498 Littlefield, C.L., Dunne, J.F., and Bode, H.R. (1985). Spermatogenesis in *Hydra oligactis*. *Dev. Biol.*  
499 *110*, 308–320.
- 500 Maginnis, T.L. (2006). The costs of autotomy and regeneration in animals: a review and framework for  
501 future research. *Behav. Ecol.* *17*, 857–872.
- 502 Marcum, B.A. (1983). Culturing Epithelial Hydra. In *Hydra: Research Methods*, H.M. Lenhoff, ed.  
503 (Springer US), pp. 287–290.
- 504 Marcum, B.A., and Campbell, R.D. (1978). Development of *Hydra* lacking nerve and interstitial cells.  
505 *J. Cell Sci.* *29*, 17–33.
- 506 McGinley, M.A., and Charnov, E.L. (1988). Multiple resources and the optimal balance between size  
507 and number of offspring. *Evol. Ecol.* *2*, 77–84.
- 508 Miller, M.A., Technau, U., Smith, K.M., and Steele, R.E. (2000). Oocyte Development in *Hydra*  
509 Involves Selection from Competent Precursor Cells. *Dev. Biol.* *224*, 326–338.
- 510 Müller, W.A. (1995). Competition for Factors and Cellular Resources as a Principle of Pattern  
511 Formation in *Hydra*. *Dev. Biol.* *167*, 159–174.

- 512 Newmark, P.A., Wang, Y., and Chong, T. (2008). Germ Cell Specification and Regeneration in  
513 Planarians. *Cold Spring Harb. Symp. Quant. Biol.* 73, 573–581.
- 514 Nishimiya-Fujisawa, C., and Kobayashi, S. (2012). Germline stem cells and sex determination in  
515 Hydra. *Int. J. Dev. Biol.* 56, 499–508.
- 516 Plickert, G., Frank, U., and Müller, W.A. (2012). Hydractinia, a pioneering model for stem cell biology  
517 and reprogramming somatic cells to pluripotency. *Int. J. Dev. Biol.* 56, 519–534.
- 518 R Core Team (2017). R: A language and environment for statistical computing. (Vienna, Austria: R  
519 Foundation for Statistical Computing).
- 520 Reisa, J. (1973). Ecology of hydra. In *Biology of Hydra*, A. Burnett, ed. (New York and London:  
521 Academic Press), pp. 59–105.
- 522 Ribi, G., Tardent, R., Tardent, P., and Scascighini, C. (1985). Dynamics of hydra populations in Lake  
523 Zürich, Switzerland, and Lake Maggiore, Italy. *Swiss J. Hydrol.* 47, 45–56.
- 524 Rinkevich, B. (1996). Do reproduction and regeneration in damaged corals compete for energy  
525 allocation? *Mar. Ecol. Prog. Ser.* 143, 297–302.
- 526 Rinkevich, B., & Loya, Y. (1989). Reproduction in regenerating colonies of the coral *Stylophora*  
527 *pistillata*. *Environmental quality and ecosystem stability*, 4, 257-265.
- 528 Roff, D.A. (2002). *Life History Evolution* (Sinauer).
- 529 Romero, R., Baguna, J., and Calow, P. (1991). Intraspecific Variation in Somatic Cell Turnover and  
530 Regenerative Rate in the Freshwater Planarian *Dendrocoelum Lacteum*. *Invertebr. Reprod. Dev.* 20,  
531 107–113.
- 532 Saccucci, M.J., Denton, R.D., Holding, M.L., and Gibbs, H.L. (2016). Polyploid unisexual salamanders  
533 have higher tissue regeneration rates than diploid sexual relatives. *J. Zool.* 300, 77–81.
- 534 Sato, K., Shibata, N., Orii, H., Amikura, R., Sakurai, T., Agata, K., Kobayashi, S., and Watanabe, K.  
535 (2006). Identification and origin of the germline stem cells as revealed by the expression of nanos-  
536 related gene in planarians. *Dev. Growth Differ.* 48, 615–628.
- 537 Schaible, R., Sussman, M., and Kramer, B.H. (2014). Aging and Potential for Self-Renewal: Hydra  
538 Living in the Age of Aging - A Mini-Review. *Gerontology* 60, 548–556.
- 539 Schaible, R., Scheuerlein, A., Daňko, M.J., Gampe, J., Martínez, D.E., and Vaupel, J.W. (2015).  
540 Constant mortality and fertility over age in Hydra. *Proc. Natl. Acad. Sci.* 112, 15701–15706.
- 541 Schenkelaars, Q., Tomczyk, S., Wenger, Y., Ekundayo, K., Girard, V., Buzgariu, W., Austad, S., and  
542 Galliot, B. (2017). Hydra, a model system for deciphering the mechanisms of aging and resistance to  
543 aging. In *Handbook for Models on Human Aging*, (Elsevier), p.
- 544 Schuchert, P. (2010). The European athecate hydroids and their medusae (Hydrozoa, Cnidaria):  
545 Capitata Part 2. *Rev. Suisse Zool.* 117, 337–555.
- 546 Schwenke, R.A., Lazzaro, B.P., and Wolfner, M.F. (2016). Reproduction–Immunity Trade-Offs in



- 547 Insects. *Annu. Rev. Entomol.* 61, 239–256.
- 548 Seifert, A.W., Monaghan, J.R., Smith, M.D., Pasch, B., Stier, A.C., Michonneau, F., and Maden, M.  
549 (2012). The influence of fundamental traits on mechanisms controlling appendage regeneration. *Biol.*  
550 *Rev.* 87, 330–345.
- 551 Simpson, T.L. (1984). *The Cell Biology of Sponges* (New York: Springer-Verlag).
- 552 Stearns, S.C. (1992). *The Evolution of Life Histories* (OUP Oxford).
- 553 Sugiyama, T., and Wanek, N. (1993). Genetic Analysis of Developmental Mechanisms in Hydra. *Dev.*  
554 *Biol.* 160, 64–72.
- 555 Tardent, P., and Tardent, R. (1956). Wiederholte regeneration bei Tubularia. *Publ. Staz. Zool. Napoli*,  
556 28, 367-396.
- 557 Tardent, P. (1963). Regeneration in the Hydrozoa. *Biol. Rev.* 38, 293–333.
- 558 Tardent, P. (1968). Experiments about sex determination in *Hydra attenuata* Pall. *Dev. Biol.* 17, 483–  
559 511.
- 560 Tardent, P. (1974). Gametogenesis in the Genus Hydra. *Am. Zool.* 14, 447–456.
- 561 Tökölyi, J., Ósz, Z., Sebestyén, F., and Barta, Z. (in press). Resource allocation and post-reproductive  
562 degeneration in the freshwater cnidarian *Hydra oligactis* (Pallas, 1766). *Zoology*.
- 563 Tomczyk, S., Fischer, K., Austad, S., and Galliot, B. (2015). Hydra, a powerful model for aging studies.  
564 *Invertebr. Reprod. Dev.* 59, 11–16.
- 565 Welch, P.S., and Loomis, H.A. (1924). A Limnological Study of *Hydra oligactis* in Douglas Lake,  
566 Michigan. *Trans. Am. Microsc. Soc.* 43, 203.
- 567 Yoshida, K., Fujisawa, T., Hwang, J.S., Ikeo, K., and Gojobori, T. (2006). Degeneration after sexual  
568 differentiation in hydra and its relevance to the evolution of aging. *Gene* 385, 64–70.
- 569 Zera, A.J., and Harshman, L.G. (2001). The Physiology of Life History Trade-Offs in Animals. *Annu.*  
570 *Rev. Ecol. Syst.* 32, 95–126.
- 571 Zera, A.J., and Zhao, Z. (2006). Intermediary Metabolism and Life-History Trade-Offs: Differential  
572 Metabolism of Amino Acids Underlies the Dispersal-Reproduction Trade-Off in a Wing-Polymorphic  
573 Cricket. *Am. Nat.* 167, 889–900.
- 574 Zhang, X., Fei, K., Agbas, A., Yan, L., Zhang, J., O'Reilly, B., Deutzmann, R., and Jr. Sarras, M.P.  
575 (2002). Structure and function of an early divergent form of laminin in hydra: a structurally conserved  
576 ECM component that is essential for epithelial morphogenesis. *Dev. Genes Evol.* 212, 159–172.
- 577 Zihler, J. (1972). Zur Gametogenese und Befruchtungsbiologie von *Hydra*. *Wilhelm Roux Arch. Für*  
578 *Entwicklungsmechanik Org.* 169, 239–267.
